# Supplementary material for: The oxidation of Ni(ii) N-confused porphyrins (NCPs) with azo radical initiators and an unexpected intramolecular nucleophilic substitution reaction via a proposed Ni(iii) NCP intermediate
Source: Royal Society of Chemistry journal article supplement (doi:10.1039/b904615a), 2009-01-01
Supplement: b904615a.pdf [file b904615a.pdf]

## Electronic Supplementary Information

# The Oxidation of Ni(II) N-Confused Porphyrins (NCPs) with Azo Radical Initiators and an Unexpected Intramolecular Nucleophilic Substitution Reaction via a Proposed Ni(III) NCP Intermediate

Hua –Wei Jiang,<sup>a</sup> Qing –Yun Chen,<sup>a</sup> Ji –Chang Xiao\*<sup>a</sup> and Yu –Cheng Gu<sup>b</sup>

<sup>a</sup> Key Laboratory of Organofluorine Chemistry, Shanghai Institute of Organic Chemistry, Chinese Academy of Sciences, 354 Fenglin Road, Shanghai 200032, P. R. China. Fax: (+86) 21-64166128; E-mail: jchxiao@mail.sioc.ac.cn

<sup>b</sup> Syngenta, Jealott's Hill International Research Centre, Bracknell, Berkshire, RG42 6EY, UK

## Contents

- Page 2-6: Experimental details and characterization data for the products **Ni1a-c**, **Ni2a-c**, **1a-c**.
- Page 7-11: Copies of <sup>1</sup>H NMR spectra of **Ni1a-c**, **Ni2a-c**, **1a-c**.
- Page 12-13: Copies of the MS spectrum and HRMS report of the proposed Ni(III) intermediates.

**General:** <sup>1</sup>H (300MHz) and <sup>19</sup>F (282MHz) NMR spectra were recorded with a Bruker AM-300 or Varian-VXR (300MHz) spectrometer. Chemical shifts are reported in parts per million (ppm)

relative to TMS as an internal standard ( $\delta_{\text{TMS}} = 0$  ppm) for  $^1\text{H}$  NMR spectra. MS and HRMS were recorded on a Hewlett-Packard HP-5989A spectrometer and a Finnigan MAT-8483 mass spectrometer. UV/Vis spectra were measured with a Varian Cary 100 spectrophotometer. Elementary analyses were obtained on a Perkin Elmer 2400 Series Elemental Analyzer. TLC analysis were performed on silica gel plate and column chromatography over silica gel (mesh 300-400). Unless otherwise noted, reagents were commercial available and used as received. The solvent toluene was treated with Na and redistilled before using. The starting N-confused porphyrins and Ni(II) N-Confused Porphyrins were synthesized according to the literatures (G. Richard Geier III, Denise M. Haynes, Jonathan S. Lindsey. **1999**, *9*, 1455, and Chmielewski, P. J.; Latos-Grażyński, L.; Rachlewicz, K.; Głowiak, T. *Angew. Chem.* **1994**, *104*, 805; *Angew. Chem. Int. Ed.* **1994**, *33*, 779.).

**Typical procedure for synthesis of 21-C cyano- or alkoxy-carbonyl-substituted Ni(II) N-confused porphyrins.** A mixture of **Ni1** (67 mg, 0.1 mmol) and AIBN (66 mg, 0.4 mmol) was stirred in 10 mL anhydrous toluene at 60 °C for about 4 hours. The reaction course was monitored by TLC. When **Ni1** was totally consumed, the reaction mixture was cooled. After chromatography on silica gel column using  $\text{CH}_2\text{Cl}_2$  as an eluent (the first yellow-greenish band was collected) and crystallization from  $\text{CH}_2\text{Cl}_2/\text{MeOH}$ , a purple solid **Ni1a** was obtained.

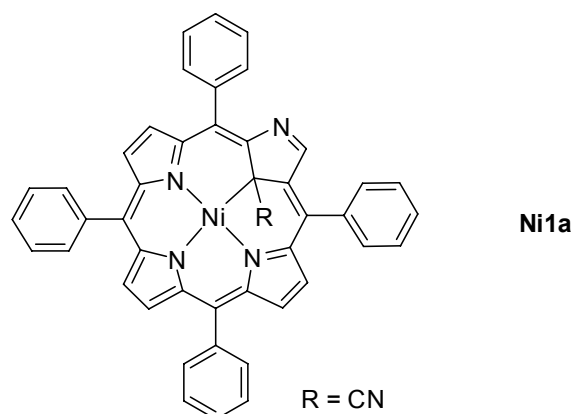

**Ni1a:** yield 45%.  $^1\text{H}$  NMR (300 MHz,  $\text{CDCl}_3$ ):  $\delta = 10.07$  (s, 1H), 8.73 (d,  $J = 5.0$  Hz, 1H), 8.70 (d,  $J = 5.0$  Hz, 1H), 8.51 ~ 8.62 (m, 4H), 7.65 ~ 8.20 (m, 20H). UV/Vis ( $\text{CH}_2\text{Cl}_2$ ):  $\lambda_{\text{max}}$  (relative intensity) = 430 (18.0), 714 (1.0) nm. HRMS (MALDI): Calcd. for  $[\text{C}_{45}\text{H}_{27}\text{N}_5\text{Ni}+\text{H}]^+$ : 696.16927. Found: 696.1691.

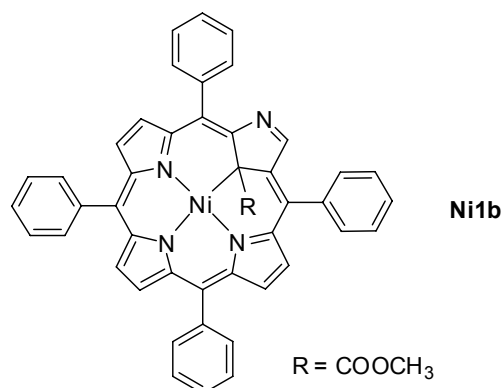

**Ni1b**: yield 38%.  $^1\text{H}$  NMR (300 MHz,  $\text{CDCl}_3$ ):  $\delta$  = 9.99 (s, 1H), 8.69 (d,  $J$  = 5.1 Hz, 1H), 8.66 (d,  $J$  = 5.1 Hz, 1H), 8.52 ~ 8.56 (m, 2H), 8.49 (d,  $J$  = 5.0 Hz, 1H), 8.44 (d,  $J$  = 5.0 Hz, 1H), 7.63 ~ 8.22 (m, 20H), 1.60 (s, 3H). UV/Vis ( $\text{CH}_2\text{Cl}_2$ ):  $\lambda_{\text{max}}$  (relative intensity) = 434 (6.5), 699 (1.0) nm. MS (MALDI):  $m/z$  729.2 ( $[\text{C}_{46}\text{H}_{30}\text{N}_4\text{NiO}_2+\text{H}]^+$ ). Anal. Calcd. for  $\text{C}_{46}\text{H}_{30}\text{N}_4\text{NiO}_2\cdot\text{CH}_2\text{Cl}_2\cdot\text{H}_2\text{O}$ : C, 67.28; H, 4.12; N, 6.73. Found: C, 67.35; H, 4.16; N, 6.67.

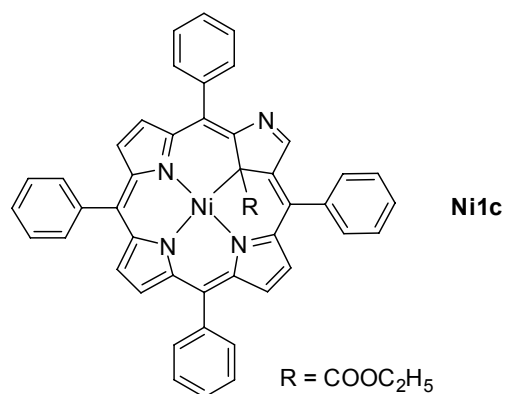

**Ni1c**: yield 37%.  $^1\text{H}$  NMR (300 MHz,  $\text{CDCl}_3$ ):  $\delta$  = 10.00 (s, 1H), 8.69 (d,  $J$  = 5.0 Hz, 1H), 8.66 (d,  $J$  = 5.0 Hz, 1H), 8.54 (d,  $J$  = 5.0 Hz, 2H), 8.49 (d,  $J$  = 4.8 Hz, 1H), 8.45 (d,  $J$  = 4.8 Hz, 1H), 7.64 ~ 8.24 (m, 20H), 2.00 (q,  $J$  = 7.1 Hz, 2H), -0.41 (t,  $J$  = 7.1 Hz, 3H). UV/Vis ( $\text{CH}_2\text{Cl}_2$ ):  $\lambda_{\text{max}}$  (relative intensity) = 435 (11.0), 696 (1.0) nm. MS (MALDI):  $m/z$  743.2 ( $[\text{C}_{47}\text{H}_{32}\text{N}_4\text{NiO}_2+\text{H}]^+$ ). Anal. Calcd. for  $\text{C}_{47}\text{H}_{32}\text{N}_4\text{NiO}_2\cdot\text{CH}_3\text{OH}$ : C, 74.34; H, 4.68; N, 7.22. Found: C, 74.10; H, 5.10; N, 6.82.

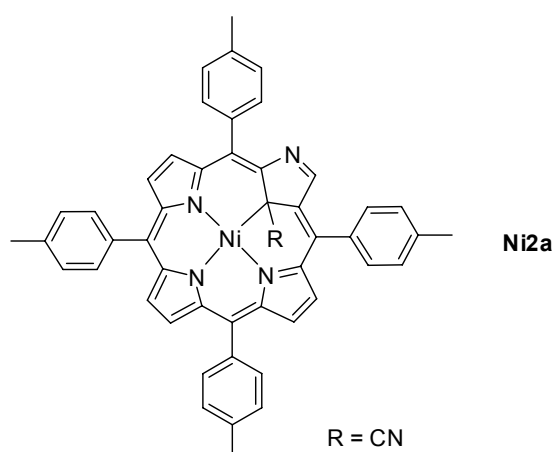

**Ni2a**: yield 42%.  $^1\text{H}$  NMR (300 MHz,  $\text{CDCl}_3$ ):  $\delta$  = 10.02 (s, 1H), 8.68 ~ 8.73 (m, 2H), 8.50 ~ 8.61 (m, 4H), 7.46 ~ 8.05 (m, 16H), 2.61 ~ 2.71 (m, 12H). UV/Vis ( $\text{CH}_2\text{Cl}_2$ ):  $\lambda_{\text{max}}$  (relative intensity) = 434 (15.5), 716 (1.0) nm. MS (MALDI):  $m/z$  752.2 ( $[\text{C}_{49}\text{H}_{35}\text{N}_5\text{Ni}+\text{H}]^+$ ). Anal. Calcd. for  $\text{C}_{49}\text{H}_{35}\text{N}_5\text{Ni}\cdot\text{H}_2\text{O}$ : C, 76.38; H, 4.84; N, 9.09. Found: C, 76.59; H, 5.07; N, 8.89.

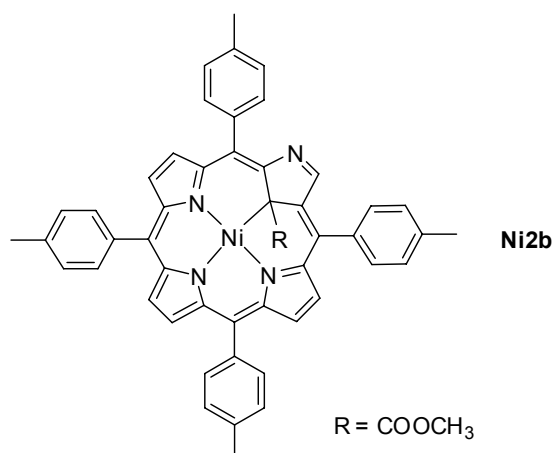

**Ni2b**: yield 40%. <sup>1</sup>H NMR (300 MHz, CDCl<sub>3</sub>): δ = 9.97 (s, 1H), 8.65 ~ 8.71 (m, 2H), 8.43 ~ 8.58 (m, 4H), 7.45 ~ 8.16 (m, 16H), 2.60 ~ 2.69 (m, 12H), 1.60 (s, 3H). UV/Vis (CH<sub>2</sub>Cl<sub>2</sub>): λ<sub>max</sub> (relative intensity) = 436 (10.9), 700 (1.0) nm. MS (MALDI): *m/z* 785.2 ([C<sub>50</sub>H<sub>38</sub>N<sub>4</sub>NiO<sub>2</sub>+H]<sup>+</sup>). Anal. Calcd. for C<sub>50</sub>H<sub>38</sub>N<sub>4</sub>NiO<sub>2</sub>·1.5H<sub>2</sub>O: C, 73.90; H, 5.09; N, 6.89. Found: C, 73.93; H, 5.15; N, 6.75.

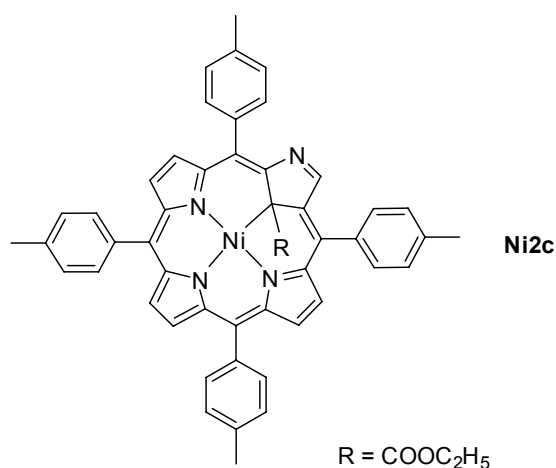

**Ni2c**: yield 39%. <sup>1</sup>H NMR (300 MHz, CDCl<sub>3</sub>): δ = 9.96 (s, 1H), 8.63 ~ 8.70 (m, 2H), 8.51 ~ 8.56 (m, 2H), 8.48 (d, *J* = 5.0 Hz, 1H), 8.44 (d, *J* = 5.0 Hz, 1H), 7.40 ~ 8.19 (m, 16H), 2.60 ~ 2.68 (m, 12H), 1.97 (q, *J* = 7.6 Hz, 2H), -0.43 (t, *J* = 7.6 Hz, 3H). UV/Vis (CH<sub>2</sub>Cl<sub>2</sub>): λ<sub>max</sub> (relative intensity) = 437 (32.5), 727 (1.0) nm. MS (MALDI): *m/z* 799.3 ([C<sub>51</sub>H<sub>40</sub>N<sub>4</sub>NiO<sub>2</sub>+H]<sup>+</sup>). Anal. Calcd for C<sub>51</sub>H<sub>40</sub>N<sub>4</sub>NiO<sub>2</sub>·2H<sub>2</sub>O: C, 73.30; H, 5.31; N, 6.70. Found: C, 73.41; H, 5.07; N, 6.27.

**Typical Procedure for the demetallation of 21-C cyano- or alkoxy-carbonyl-substituted Ni(II) N-confused porphyrins.** Solution of **Ni1a** (20 mg, 0.029 mmol) in 5 mL of dichloromethane was shaken with 5 mL concentrated hydrochloric acid for 5 min. Then the water layer was removed, and organic layer was washed with water and dried with sodium carbonate. Chromatography on a silica gel column with dichloromethane/methanol 100:1 (V/V) as an eluent (green band was collected) and crystallization from CH<sub>2</sub>Cl<sub>2</sub>/MeOH, gave **1a**.

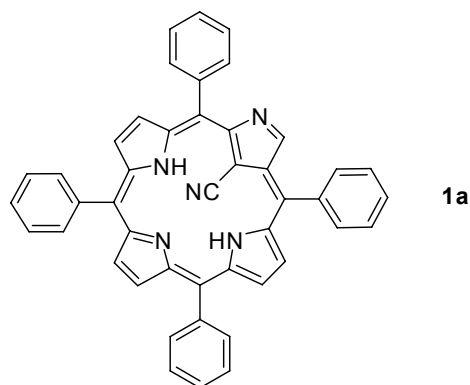

**1a**: yield 75%.  $^1\text{H NMR}$  (300 MHz,  $\text{CDCl}_3$ ):  $\delta$  = 9.12 (d,  $J$  = 5.0 Hz, 1H), 9.07 (d,  $J$  = 5.0 Hz, 1H), 8.68 ~ 8.76 (m, 2H), 8.60 ~ 8.65 (m, 2H), 8.43 ~ 8.52 (m, 4H), 8.15 ~ 8.30 (m, 4H), 7.73 ~ 7.98 (m, 13H). UV/Vis ( $\text{CH}_2\text{Cl}_2$ ):  $\lambda_{\text{max}}$  (relative intensity) = 454 (18.6), 554 (1.0), 601 (1.2), 710 (1.6) nm. MS (MALDI):  $m/z$ , 640.2 ( $[\text{C}_{45}\text{H}_{29}\text{N}_5+\text{H}]^+$ ). Anal. Calcd for  $\text{C}_{45}\text{H}_{29}\text{N}_5 \cdot \text{CH}_2\text{Cl}_2 \cdot \text{CH}_3\text{OH}$ : C, 74.60; H, 4.66; N, 9.25. Found: C, 74.80; H, 4.83; N, 8.89.

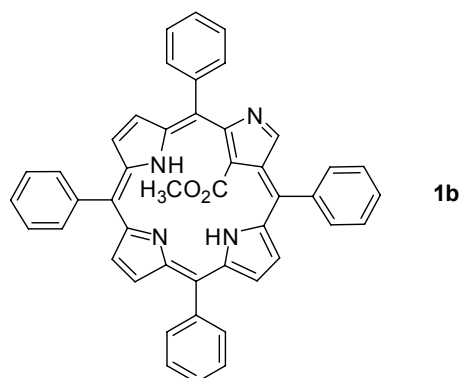

**1b**: yield 74%.  $^1\text{H NMR}$  (300 MHz,  $\text{CDCl}_3$ ):  $\delta$  = 9.17 (d,  $J$  = 5.0 Hz, 1H), 9.12 (d,  $J$  = 5.0 Hz, 1H), 8.68 ~ 8.74 (m, 2H), 8.52 ~ 8.56 (m, 2H), 8.39 ~ 8.49 (m, 4H), 8.19 ~ 8.28 (m, 2H), 8.05 ~ 8.13 (m, 2H), 7.69 ~ 7.93 (m, 13H), 0.29 (s, 3H). UV/Vis ( $\text{CH}_2\text{Cl}_2$ ):  $\lambda_{\text{max}}$  (relative intensity) = 463 (15.1), 566 (1.0), 617 (1.3), 717 (1.3) nm. HRMS (MALDI): Calcd. for  $[\text{C}_{46}\text{H}_{32}\text{N}_4\text{O}_2+\text{H}]^+$ : 673.25980. Found: 673.2615.

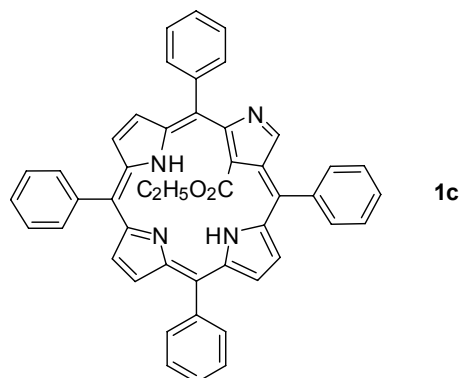

**1c**: yield 76%.  $^1\text{H}$  NMR (300 MHz,  $\text{CDCl}_3$ ):  $\delta$  = 9.16 (d,  $J$  = 5.0 Hz, 1H), 9.11 (d,  $J$  = 5.0 Hz, 1H), 8.70 ~ 8.75 (m, 2H), 8.50 ~ 8.56 (m, 2H), 8.40 ~ 8.47 (m, 4H), 8.15 ~ 8.27 (m, 2H), 8.03 ~ 8.14 (m, 2H), 7.68 ~ 7.94 (m, 13H), 0.87 (q,  $J$  = 6.9 Hz, 2H), -1.51 (t,  $J$  = 6.9 Hz, 3H). UV/Vis ( $\text{CH}_2\text{Cl}_2$ ):  $\lambda_{\text{max}}$  (relative intensity) = 463 (16.2), 565 (1.0), 616 (1.3), 717 (1.3) nm. HRMS (MALDI): Calcd. for  $[\text{C}_{47}\text{H}_{34}\text{N}_4\text{O}_2+\text{H}]^+$ : 687.27545. Found: 687.2781

Copies of  $^1\text{H}$  NMR spectra

Extra peaks at 1.5 ppm in the  $^1\text{H}$  NMR spectra of most of the products are the signals of water. And the small signals at 1.3 ppm in some of the  $^1\text{H}$  NMR spectra are the signals of small amount of impurities.

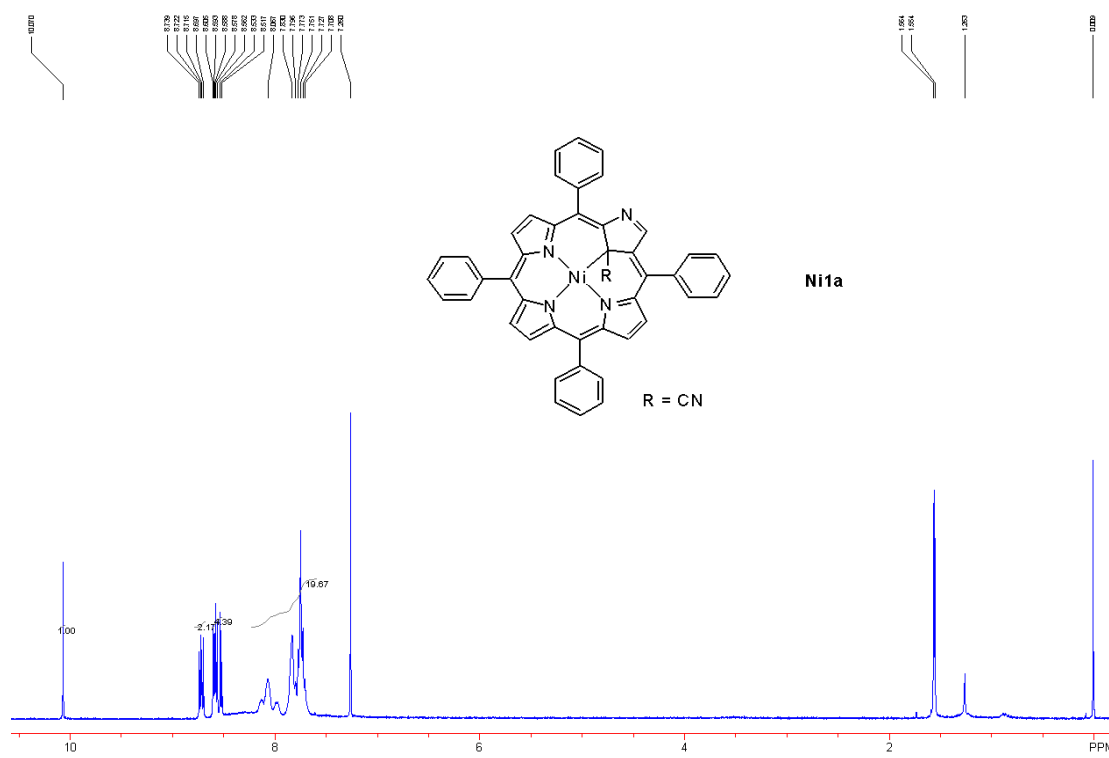

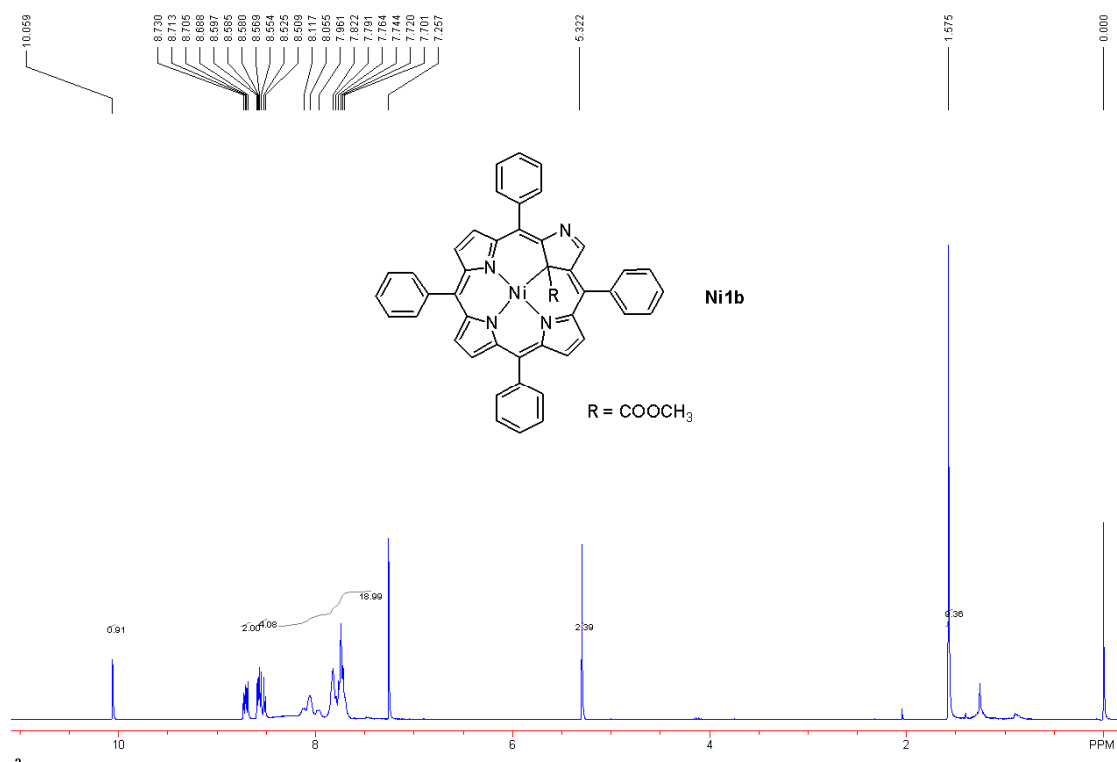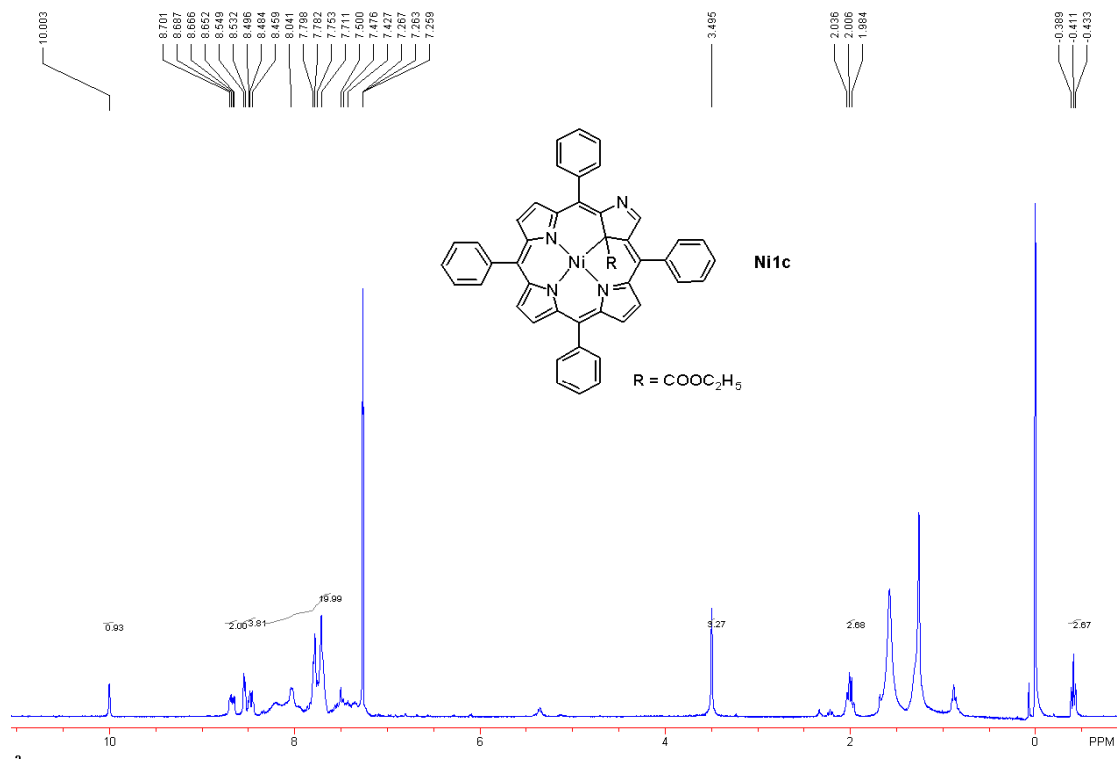

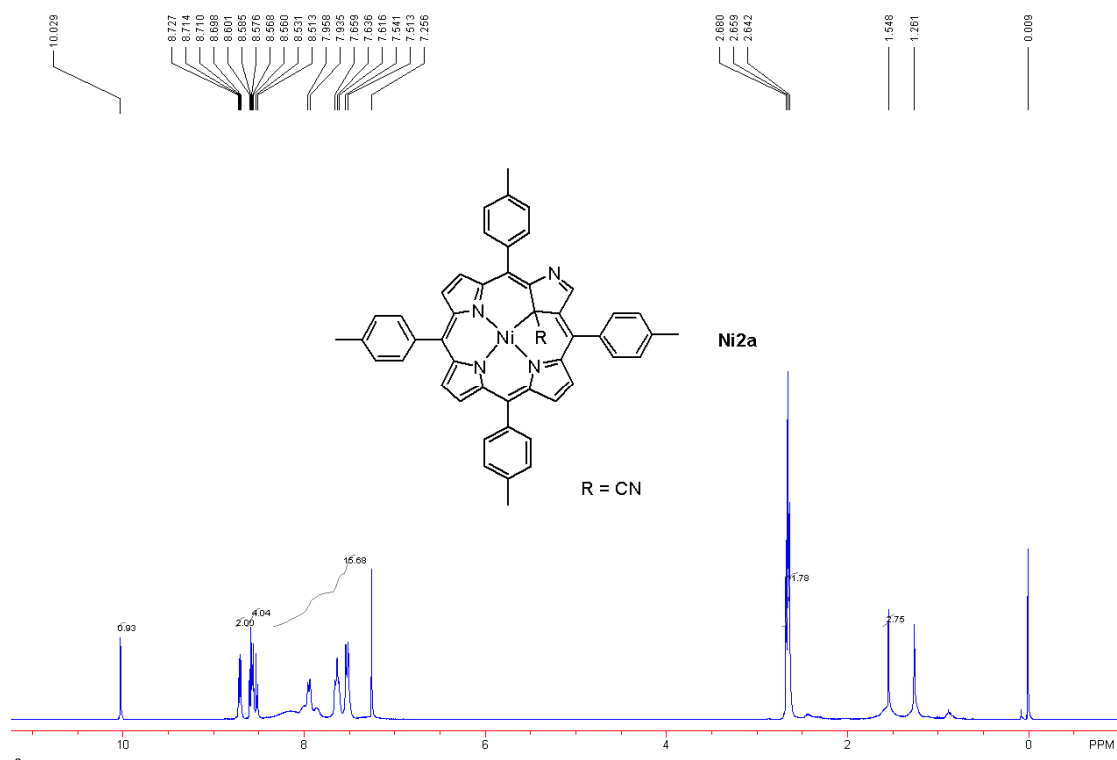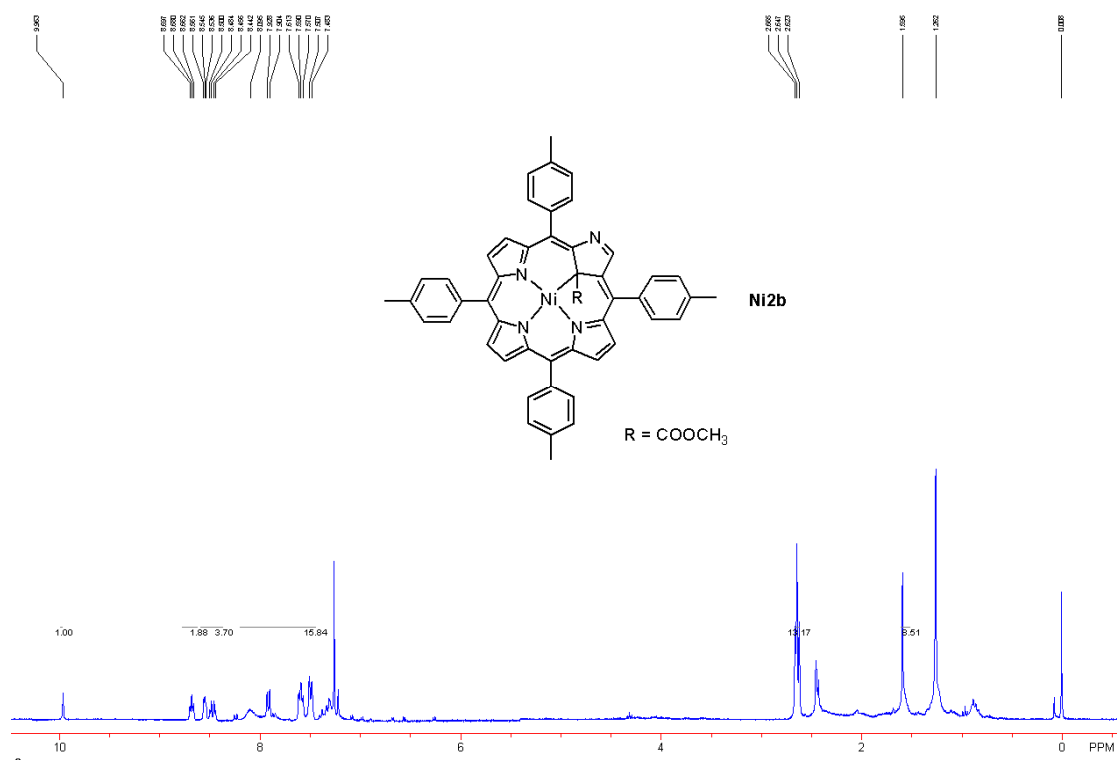







Copies of the MS spectrum of the proposed Ni(III) intermediates.

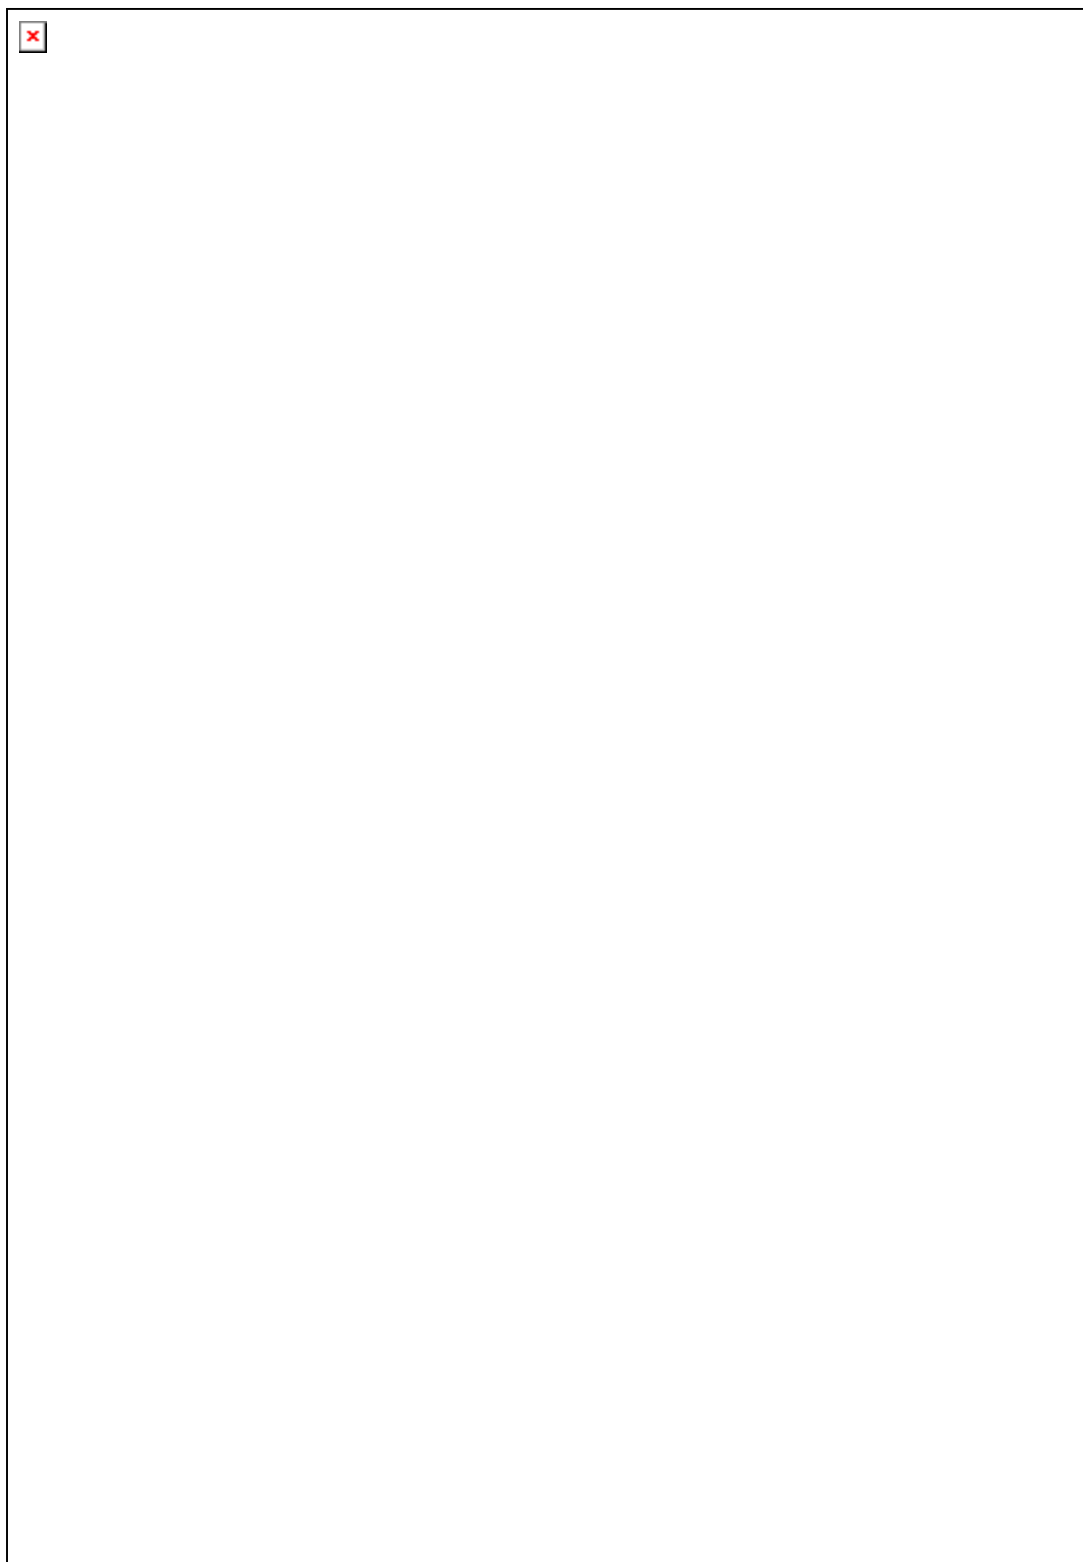

Copies of the HRMS report of the proposed Ni(III) intermediates.

Shanghai Institute of Organic Chemistry  
Chinese Academic of Sciences  
High Resolution MS DATA REPORT

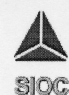

Instrument:

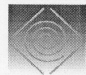

IonSpec 4.7 Tesla FTMS

Card Serial Number: I082633

Sample Serial Number: Inter3

Operator : HuaQin Date: 2008/10/21

Operation Mode: MALDI/DHB

**Elemental Composition Search Report:**

**Target Mass:**

Target m/z = 827.2880 ± 0.004

Charge = +1

**Possible Elements:**

| Element: | Exact Mass: | Min: | Max: |
|----------|-------------|------|------|
| C        | 12.000000   | 0    | 100  |
| H        | 1.007825    | 0    | 100  |
| N        | 14.003074   | 0    | 5    |
| O        | 15.994915   | 0    | 5    |
| Ni       | 57.935348   | 0    | 1    |

**Additional Search Restrictions:**

DBE Limit Mode = Both Integer and Half-Integer

Minimum DBE = 0

**Search Results:**

Number of Hits = 5

| m/z       | Delta m/z | DBE  | Formula                                                                        |
|-----------|-----------|------|--------------------------------------------------------------------------------|
| 827.28905 | -0.00105  | 33.5 | C <sub>53</sub> H <sub>45</sub> N <sub>4</sub> O <sub>2</sub> Ni <sup>+1</sup> |
| 827.28909 | -0.00109  | 41.0 | C <sub>56</sub> H <sub>37</sub> N <sub>5</sub> O <sub>3</sub> <sup>+1</sup>    |
| 827.28637 | 0.00163   | 29.0 | C <sub>50</sub> H <sub>47</sub> N <sub>3</sub> O <sub>5</sub> Ni <sup>+1</sup> |
| 827.29039 | -0.00239  | 33.0 | C <sub>55</sub> H <sub>47</sub> NO <sub>3</sub> Ni <sup>+1</sup>               |
| 827.29043 | -0.00243  | 40.5 | C <sub>58</sub> H <sub>39</sub> N <sub>2</sub> O <sub>4</sub> <sup>+1</sup>    |
